# Supplementary material
Source: ML conference proceedings conference paper supplement (https://openaccess.thecvf.com/content/CVPRW_2020/html/Hickey_Hierarchical_Color_Learning_CVPRW_2020_paper.html)
Supplement: Supplementary file 1 [file Hickey_Hierarchical_Color_Learning_CVPRW_2020_supplemental.pdf]

I am including a github link as supplementary material, which includes code for running the experiments and the result files for both experiments:

[https://github.com/chrisickey/color\\_hierarchy\\_experiment](https://github.com/chrisickey/color_hierarchy_experiment)
